# Supplementary material for: Fabrication of two Se/CsPbBr3 heterojunctions structures for self-powered UV–visible photodetectors
Source: Royal Society of Chemistry journal article supplement (doi:10.1039/d2ra06597e), 2022-01-01
Supplement: d2ra06597e1.pdf [file d2ra06597e1.pdf]

## Fabrication of two Se/CsPbBr<sub>3</sub> heterojunctions structures for Self-powered UV-Visible Photodetectors

Liu Jiaojiao<sup>1,2</sup> and Jie Zhang<sup>\*1,2</sup>

1. School of Electronic and Information Engineering, Changshu Institute of Technology,  
Changshu 215500, China
2. Suzhou Key Laboratory of Advanced Lighting and Display Technologies  
E-mail: [liujiaojiao@cslg.edu.cn](mailto:liujiaojiao@cslg.edu.cn); [zj2016@cslg.edu.cn](mailto:zj2016@cslg.edu.cn)

Supporting Information :

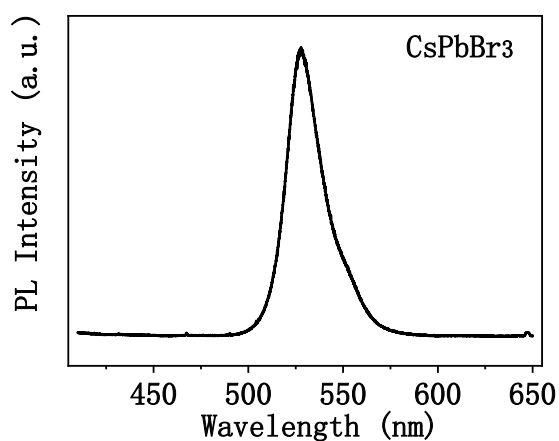

Fig. S1: PL profiles of the CsPbBr<sub>3</sub> particle

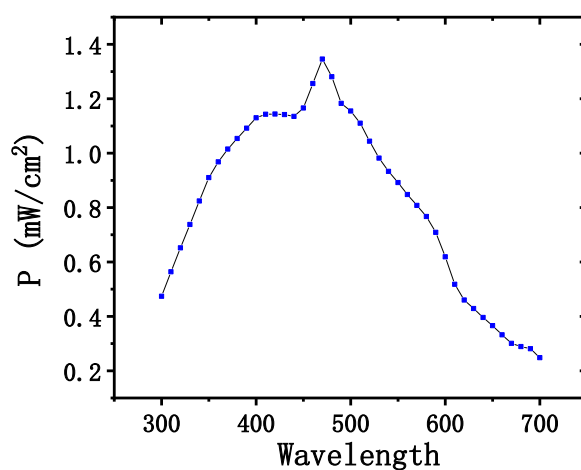

Fig. S2: Light intensity distribution plot curve.
